# Supplementary material for: Clinical Outcomes of Tirzepatide or GLP-1 Receptor Agonists in Individuals With Type 2 Diabetes
Source: PubMed Central journal article supplement (PMC11320168; doi:10.1001/jamanetworkopen.2024.27258), 2024-08-12
Supplement: jamanetwopen-e2427258-s001.pdf [file jamanetwopen-e2427258-s001.pdf]

## Supplemental Online Content

Chuang M-H, Chen J-Y, Wang H-Y, Jiang Z-H, Wu V-C. Clinical outcomes of tirzepatide or GLP-1 receptor agonists in individuals with type 2 diabetes. *JAMA Netw Open*. 2024;7(8):e2427258. doi:10.1001/jamanetworkopen.2024.27258

**eTable 1.** Demographic, Diagnostic, Procedural, Medication, Visit, and Laboratory Codes Used in the Definition of the Cohorts

**eTable 2.** Demographic, Diagnostic, and Laboratory Codes Used in the Definition of Covariates

**eTable 3.** Diagnostic, Visit, and Procedural Codes Used in the Definition of Outcomes

**eTable 4.** Numbers and Characteristics of Individuals Excluded Because of a Lack of Any Follow-Up

**eTable 5.** Adjusted Hazard Ratios for the Components of Major Adverse Cardiovascular Events and Kidney Events

**eTable 6.** Sensitivity Analysis Incorporating Individuals Without Follow-Up Into Propensity Score Matching and Survival Analysis of Primary and Secondary Outcomes

**eTable 7.** Changes in Mean Glycated Hemoglobin Level and Body Weight (95% CI)

**eFigure 1.** Changes in Glycated Hemoglobin Level and Body Weight From Baseline

**eFigure 2.** Forest Plot of Primary and Secondary Outcomes Compared Between Different Doses of Tirzepatide and GLP-1 RA

**eFigure 3.** Results for Negative Control Outcomes and Analysis With Negative Control Exposure

**eFigure 4.** Subgroup Analysis of All-Cause Mortality Between Tirzepatide and GLP-1 RA Groups

**eFigure 5.** Subgroup Analysis of Major Adverse Cardiovascular Events Between Tirzepatide and GLP-1 RA Groups

**eFigure 6.** Subgroup Analysis of the Composite of Major Adverse Cardiovascular Events and All-Cause Mortality Between Tirzepatide and GLP-1 RA Groups

**eFigure 7.** Subgroup Analysis of Kidney Events Between Tirzepatide and GLP-1 RA Groups

**eFigure 8.** Subgroup Analysis of Acute Kidney Injury Between Tirzepatide and GLP-1 RA Groups

**eFigure 9.** Subgroup Analysis of Major Adverse Kidney Events Between Tirzepatide and GLP-1 RA Groups

This supplemental material has been provided by the authors to give readers additional information about their work.

**eTable 1.** Demographic, Diagnostic, Procedural, Medication, Visit, and Laboratory Codes Used in the Definition of the Cohorts

| Category                                                                                                                                                                                            | Code               | Description                                                                         |
|-----------------------------------------------------------------------------------------------------------------------------------------------------------------------------------------------------|--------------------|-------------------------------------------------------------------------------------|
| <b>Tirzepatide group</b>                                                                                                                                                                            |                    |                                                                                     |
| #1: At least 18 years old                                                                                                                                                                           |                    |                                                                                     |
| Demographics                                                                                                                                                                                        | Age                | Age (at least 18 years)                                                             |
| #2: Patients with type 2 diabetes mellitus treated with tirzepatide but not GLP-1 receptor agonists. (# 2.2 must be fulfilled within 6 months before or any time after #2.1)                        |                    |                                                                                     |
| #2.1: Patients with Type 2 diabetes mellitus treated with tirzepatide (must have both of the following)<br>Date constraint: the terms in this group occurred between Jun 1, 2022 and Jun 30, 2023   |                    |                                                                                     |
| Diagnosis                                                                                                                                                                                           | UMLS:ICD10CM:E11   | Type 2 diabetes mellitus                                                            |
| Medication                                                                                                                                                                                          | NLM:RXNORM:2601723 | Tirzepatide                                                                         |
| #2.2: Not receiving GLP-1 receptor agonists (cannot have the following)                                                                                                                             |                    |                                                                                     |
| medication                                                                                                                                                                                          | NLM:ATC:A10BJ      | Glucagon-like peptide-1 (GLP-1) analogues                                           |
| #3: Without recent major adverse cardiovascular events (cannot have any of the following)<br>#3 must be fulfilled within 60 days on or before #2.1                                                  |                    |                                                                                     |
| Diagnosis                                                                                                                                                                                           | UMLS:ICD10CM:I21   | Acute myocardial infarction                                                         |
| Diagnosis                                                                                                                                                                                           | UMLS:ICD10CM:I22   | Subsequent ST elevation (STEMI) and non-ST elevation (NSTEMI) myocardial infarction |
| Diagnosis                                                                                                                                                                                           | UMLS:ICD10CM:I61   | Nontraumatic intracerebral hemorrhage                                               |
| Diagnosis                                                                                                                                                                                           | UMLS:ICD10CM:I62   | Other and unspecified nontraumatic intracranial hemorrhage                          |
| Diagnosis                                                                                                                                                                                           | UMLS:ICD10CM:I63   | Cerebral infarction                                                                 |
| #4: Incident user (cannot have the following) #4 must be fulfilled before #2.1                                                                                                                      |                    |                                                                                     |
| Medication                                                                                                                                                                                          | NLM:RXNORM:2601723 | Tirzepatide                                                                         |
| <b>GLP-1 receptor agonist group</b>                                                                                                                                                                 |                    |                                                                                     |
| #1: At least 18 years old                                                                                                                                                                           |                    |                                                                                     |
| Demographics                                                                                                                                                                                        | Age                | Age (at least 18 years)                                                             |
| #2: Patients with type 2 diabetes mellitus treated with tirzepatide but not GLP-1 receptor agonists. (# 2.2 must be fulfilled within 6 months before or any time after #2.1)                        |                    |                                                                                     |
| #2.1: Patients with Type 2 diabetes mellitus treated with tirzepatide (must have both of the following);<br>Date constraint: the terms in this group occurred between Jun 1, 2022 and Jun 30, 2023) |                    |                                                                                     |
| Diagnosis                                                                                                                                                                                           | UMLS:ICD10CM:E11   | Type 2 diabetes mellitus                                                            |
| Medication                                                                                                                                                                                          | NLM:ATC:A10BJ      | Glucagon-like peptide-1 (GLP-1) analogues                                           |
| #2.2: Not receiving GLP-1 receptor agonists (cannot have the following)                                                                                                                             |                    |                                                                                     |
| Medication                                                                                                                                                                                          | NLM:RXNORM:2601723 | Tirzepatide                                                                         |
| #3: Without recent major adverse cardiovascular events (cannot have any of the following)<br>#3 must be fulfilled within 60 days on or before #2.1                                                  |                    |                                                                                     |
| Diagnosis                                                                                                                                                                                           | UMLS:ICD10CM:I21   | Acute myocardial infarction                                                         |
| Diagnosis                                                                                                                                                                                           | UMLS:ICD10CM:I22   | Subsequent ST elevation (STEMI) and non-ST elevation (NSTEMI) myocardial infarction |
| Diagnosis                                                                                                                                                                                           | UMLS:ICD10CM:I61   | Nontraumatic intracerebral hemorrhage                                               |
| Diagnosis                                                                                                                                                                                           | UMLS:ICD10CM:I62   | Other and unspecified nontraumatic intracranial hemorrhage                          |
| Diagnosis                                                                                                                                                                                           | UMLS:ICD10CM:I63   | Cerebral infarction                                                                 |
| #4: Incident user (cannot have the following) #4 must be fulfilled before #2.1                                                                                                                      |                    |                                                                                     |
| Medication                                                                                                                                                                                          | NLM:ATC:A10BJ      | Glucagon-like peptide-1 (GLP-1) analogues                                           |

**eTable 2.** Demographic, Diagnostic, and Laboratory Codes Used in the Definition of Covariates

| Category     | Code    | Description                                                            |
|--------------|---------|------------------------------------------------------------------------|
| Demographics | AI      | Age at index                                                           |
| Demographics | F       | Female                                                                 |
| Demographics | 2106-3  | White                                                                  |
| Demographics | 2054-5  | Black or African American                                              |
| Demographics | 2028-9  | Asian                                                                  |
| Diagnosis    | E08-E13 | Diabetes mellitus                                                      |
| Diagnosis    | I10-I16 | Hypertensive diseases                                                  |
| Diagnosis    | C00-D49 | Neoplasms                                                              |
| Diagnosis    | J40-J47 | Chronic lower respiratory diseases                                     |
| Diagnosis    | I20-I25 | Ischemic heart diseases                                                |
| Diagnosis    | N18     | Chronic kidney disease (CKD)                                           |
| Diagnosis    | D60-D64 | Aplastic and other anemias                                             |
| Diagnosis    | I50     | Heart failure                                                          |
| Diagnosis    | I48     | Atrial fibrillation and flutter                                        |
| Diagnosis    | I60-I69 | Cerebrovascular diseases                                               |
| Diagnosis    | I73.9   | Peripheral vascular disease, unspecified                               |
| Diagnosis    | K75     | Other inflammatory liver diseases                                      |
| Diagnosis    | K74     | Fibrosis and cirrhosis of liver                                        |
| Diagnosis    | M30-M36 | Systemic connective tissue disorders                                   |
| Diagnosis    | M05     | Rheumatoid arthritis with rheumatoid factor                            |
| Diagnosis    | B20-B20 | Human immunodeficiency virus (HIV) disease                             |
| Diagnosis    | F03     | Unspecified dementia                                                   |
| Diagnosis    | E11.2   | Type 2 diabetes mellitus with kidney complications                     |
| Diagnosis    | E11.3   | Type 2 diabetes mellitus with ophthalmic complications                 |
| Diagnosis    | E11.4   | Type 2 diabetes mellitus with neurological complications               |
| Diagnosis    | E11.5   | Type 2 diabetes mellitus with circulatory complications                |
| Diagnosis    | Z55-Z65 | Health hazards related to socioeconomic and psychosocial circumstances |
| Medication   | C10AA   | HMG CoA reductase inhibitors                                           |
| Medication   | A10BA   | Biguanides                                                             |
| Medication   | C03     | Diuretics                                                              |
| Medication   | A10A    | Insulins and analogues                                                 |
| Medication   | C07     | Beta blocking agents                                                   |
| Medication   | C09C    | Angiotensin II receptor blockers                                       |
| Medication   | C09A    | Ace inhibitors                                                         |
| Medication   | A10BK   | Sodium-glucose co-transporter 2 (SGLT2) inhibitors                     |
| Medication   | C08     | Calcium channel blockers                                               |
| Medication   | A10BB   | Sulfonylureas                                                          |
| Medication   | A10BH   | Dipeptidyl peptidase 4 (DPP-4) inhibitors                              |
| Medication   | C10AB   | Fibrates                                                               |
| Medication   | A10BG   | Thiazolidinediones                                                     |
| Medication   | 341248  | Ezetimibe                                                              |
| Laboratory   | 8001    | Glomerular filtration rate by creatinine-based formula                 |
| Laboratory   | 9037    | Hemoglobin A1c/hemoglobin in blood                                     |

| <b>Category</b> | <b>Code</b> | <b>Description</b>                    |
|-----------------|-------------|---------------------------------------|
| Laboratory      | 9014        | Hemoglobin in blood                   |
| Laboratory      | 9085        | Blood pressure, systolic              |
| Laboratory      | 9002        | Cholesterol in LDL in serum or plasma |
| Laboratory      | 9000        | Cholesterol in serum or plasma        |
| Laboratory      | 9083        | Body mass index (BMI)                 |

**eTable 3.** Diagnostic, Visit, and Procedural Codes Used in the Definition of Outcomes

| Category                                                                                                    | Code                 | Description                                                                         |
|-------------------------------------------------------------------------------------------------------------|----------------------|-------------------------------------------------------------------------------------|
| <b>#1: All-cause mortality (have any of the following)</b>                                                  |                      |                                                                                     |
| Demographics                                                                                                | Deceased             | Deceased                                                                            |
| Diagnosis                                                                                                   | UMLS:ICD10CM:R99     | Ill-defined and unknown cause of mortality                                          |
| <b>#2: Major adverse cardiovascular events (have any of the following)</b>                                  |                      |                                                                                     |
| Diagnosis                                                                                                   | UMLS:ICD10CM:I21     | Acute myocardial infarction                                                         |
| Diagnosis                                                                                                   | UMLS:ICD10CM:I46.2   | Cardiac arrest due to underlying cardiac condition                                  |
| Diagnosis                                                                                                   | UMLS:ICD10CM:I46.9   | Cardiac arrest, cause unspecified                                                   |
| Diagnosis                                                                                                   | UMLS:ICD10CM:I63     | Cerebral infarction                                                                 |
| Diagnosis                                                                                                   | UMLS:ICD10CM:I61     | Nontraumatic intracerebral hemorrhage                                               |
| Diagnosis                                                                                                   | UMLS:ICD10CM:I22     | Subsequent ST elevation (STEMI) and non-ST elevation (NSTEMI) myocardial infarction |
| Diagnosis                                                                                                   | UMLS:ICD10CM:I62     | Other and unspecified nontraumatic intracranial hemorrhage                          |
| <b>#3: Kidney events (have any of the following)</b>                                                        |                      |                                                                                     |
| Diagnosis                                                                                                   | UMLS:ICD10CM:N18.5   | Chronic kidney disease, stage 5                                                     |
| Diagnosis                                                                                                   | UMLS:ICD10CM:N18.6   | End stage renal disease                                                             |
| Diagnosis                                                                                                   | UMLS:ICD10CM:Z99.2   | Dependence on renal dialysis                                                        |
| Diagnosis                                                                                                   | UMLS:ICD10CM:N19     | Unspecified kidney failure                                                          |
| Procedure                                                                                                   | UMLS:CPT:1012740     | Dialysis Services and Procedures                                                    |
| Procedure                                                                                                   | UMLS:CPT:1029674     | Dialysis Circuit Procedures                                                         |
| <b>#4: Acute kidney injury (have any of the following)</b>                                                  |                      |                                                                                     |
| Diagnosis                                                                                                   | UMLS:ICD10CM:N17     | Acute kidney failure                                                                |
| <b>#5: Major adverse cardiovascular event or all-cause mortality (have #1 or #2)</b>                        |                      |                                                                                     |
| <b>#6: Major adverse kidney event (have #1 or #3)</b>                                                       |                      |                                                                                     |
| <b>#7: Glycated hemoglobin (HbA1c) level</b>                                                                |                      |                                                                                     |
| Laboratory                                                                                                  | TNX:9037             | Hemoglobin A1c/hemoglobin in blood                                                  |
| <b>#8: Body weight</b>                                                                                      |                      |                                                                                     |
| Laboratory                                                                                                  | TNX:9081             | Body weight                                                                         |
| <b>#9: Negative control outcomes</b>                                                                        |                      |                                                                                     |
| <b>#9.1: Hernia, excluding patients with outcome prior to the follow-up time window</b>                     |                      |                                                                                     |
| Diagnosis                                                                                                   | UMLS:ICD10CM:K40-K46 | Hernia                                                                              |
| <b>#9.2: Traumatic brain injury, excluding patients with outcome prior to the follow-up time window</b>     |                      |                                                                                     |
| Diagnosis                                                                                                   | UMLS:ICD10CM:S06.5   | Traumatic subdural hemorrhage                                                       |
| Diagnosis                                                                                                   | UMLS:ICD10CM:S06.6   | Traumatic subarachnoid hemorrhage                                                   |
| Diagnosis                                                                                                   | UMLS:ICD10CM:S06.2   | Diffuse traumatic brain injury                                                      |
| Diagnosis                                                                                                   | UMLS:ICD10CM:S06.3   | Focal traumatic brain injury                                                        |
| <b>#9.3: Lumbar radiculopathy, excluding patients with outcome prior to the follow-up time window</b>       |                      |                                                                                     |
| Diagnosis                                                                                                   | UMLS:ICD10CM:M54.16  | Radiculopathy, lumbar region                                                        |
| <b>#9.4: Sensorineural hearing loss, excluding patients with outcome prior to the follow-up time window</b> |                      |                                                                                     |
| Diagnosis                                                                                                   | UMLS:ICD10CM:H90     | Conductive and sensorineural hearing loss                                           |
| <b>#9.5: Skin cancer, excluding patients with outcome prior to the follow-up time window</b>                |                      |                                                                                     |
| Diagnosis                                                                                                   | UMLS:ICD10CM:C44     | Other and unspecified malignant neoplasm of skin                                    |

**eTable 4.** Numbers and Characteristics of Individuals Excluded Because of a Lack of any Follow-Up

| Variables                            | GLP-1 receptor agonist, No (%) |                 | Tirzepatide, No (%) |                |
|--------------------------------------|--------------------------------|-----------------|---------------------|----------------|
|                                      | Included                       | No follow-up    | Included            | No follow-up   |
| <b>Number of patients</b>            | 125,474                        | 4,141           | 14,834              | 348            |
| <b>Demographics</b>                  |                                |                 |                     |                |
| Age, mean (SD), y                    | 58.1 (13.3)                    | 56 (13.7)***    | 55.4 (11.8)         | 51.8 (13.0)*** |
| Female                               | 67,474 (53.8)                  | 2,127 (51.4)**  | 8,444 (56.9)        | 179 (51.3)*    |
| African American/Black               | 25,212 (20.1)                  | 992 (24.0)***   | 2,517 (17.0)        | 73 (20.9)**    |
| Asian                                | 4,558 (3.6)                    | 149 (3.6)       | 337 (2.3)           | ≤10 (≤ 2.9)†   |
| Hispanic/Latinx                      | 11,676 (9.3)                   | 320 (7.7)**     | 957 (6.5)           | 19 (5.4)       |
| White                                | 75,762 (60.4)                  | 2,251 (54.4)*** | 9,978 (67.3)        | 206 (59.0)**   |
| <b>Comorbidities</b>                 |                                |                 |                     |                |
| Hypertensive diseases                | 72,438 (57.7)                  | 1,383 (33.4)*** | 8,265 (55.7)        | 87 (24.9)***   |
| Ischemic heart diseases              | 16,814 (13.4)                  | 295 (7.1)***    | 1,623 (10.9)        | ≤10 (≤ 2.9)†   |
| Heart failure                        | 9,447 (7.5)                    | 161 (3.9)***    | 821 (5.5)           | ≤10 (≤ 2.9)†   |
| Atrial fibrillation or flutter       | 7,334 (5.8)                    | 120 (2.9)***    | 670 (4.5)           | ≤10 (≤ 2.9)†   |
| Cerebrovascular diseases             | 5,579 (4.4)                    | 86 (2.1)***     | 437 (2.9)           | ≤10 (≤ 2.9)†   |
| Peripheral vascular diseases         | 4,150 (3.3)                    | 51 (1.2)***     | 320 (2.2)           | ≤10 (≤ 2.9)†   |
| Chronic lower respiratory diseases   | 17,673 (14.1)                  | 264 (6.4)***    | 1,789 (12.1)        | ≤10 (≤ 2.9)†   |
| Chronic kidney disease               | 14,841 (11.8)                  | 253 (6.1)***    | 1,261 (8.5)         | 15 (4.3)**     |
| Anemia                               | 10,552 (8.4)                   | 181 (4.4)***    | 822 (5.5)           | ≤10 (≤ 2.9)†   |
| Inflammatory liver diseases          | 2,064 (1.6)                    | 17 (0.4)***     | 308 (2.1)           | ≤10 (≤ 2.9)†   |
| Liver cirrhosis                      | 2,241 (1.8)                    | 26 (0.6)***     | 259 (1.7)           | 0 (0.0)*       |
| Neoplasms                            | 19,460 (15.5)                  | 227 (5.5)***    | 2,166 (14.6)        | 16 (4.6)***    |
| Systemic connective tissue disorders | 2,124 (1.7)                    | 17 (0.4)***     | 248 (1.7)           | ≤10 (≤ 2.9)†   |
| Rheumatoid arthritis                 | 632 (0.5)                      | ≤10 (≤ 0.2)†    | 74 (0.5)            | ≤10 (≤ 2.9)†   |
| HIV disease                          | 895 (0.7)                      | ≤10 (≤ 0.2)†    | 53 (0.4)            | 0 (0.0)        |
| Dementia                             | 614 (0.5)                      | 17 (0.4)        | 36 (0.2)            | 0 (0.0)        |
| <b>Diabetic complications</b>        |                                |                 |                     |                |
| Kidney complications                 | 13,700 (10.8)                  | 302 (7.3)***    | 1,281 (8.6)         | 15 (4.3)***    |
| Ophthalmic complications             | 6,015 (4.8)                    | 77 (1.9)***     | 699 (4.7)           | ≤10 (≤ 2.9)†   |
| Neurological complications           | 14,143 (11.2)                  | 223 (5.4)***    | 1,610 (10.9)        | 11 (3.2)***    |
| Circulatory complications            | 7,503 (5.9)                    | 129 (3.1)***    | 850 (5.7)           | ≤10 (≤ 2.9)†   |
| SES and psychosocial-related hazards | 4,019 (3.2)                    | 58 (1.4)***     | 322 (2.2)           | ≤10 (≤ 2.9)†   |
| <b>Medication</b>                    |                                |                 |                     |                |
| HMG CoA reductase inhibitors         | 55,876 (44.5)                  | 1,274 (30.8)*** | 5,530 (37.3)        | 79 (22.6)***   |
| Fibrates                             | 3,715 (3.0)                    | 93 (2.2)**      | 461 (3.1)           | ≤10 (≤ 2.9)†   |
| Ezetimibe                            | 3,536 (2.8)                    | 61 (1.5)***     | 427 (2.9)           | ≤10 (≤ 2.9)†   |
| Biguanides                           | 54,056 (43.1)                  | 1,184 (28.6)*** | 5,449 (36.7)        | 74 (21.2)***   |
| Sulfonylureas                        | 17,517 (14.0)                  | 426 (10.3)***   | 1,397 (9.4)         | 23 (6.6)       |
| DPP-4 inhibitors                     | 10,329 (8.2)                   | 228 (5.5)***    | 842 (5.7)           | 14 (4.0)       |
| Thiazolidinediones                   | 3,565 (2.8)                    | 87 (2.1)**      | 393 (2.7)           | ≤10 (≤ 2.9)†   |
| SGLT2 inhibitors                     | 19,843 (15.8)                  | 477 (11.5)***   | 2,544 (17.2)        | 31 (8.9)***    |
| Insulins                             | 34,311 (27.3)                  | 956 (23.1)***   | 3,870 (26.1)        | 39 (11.2)***   |

|                                    |               |                |              |                 |
|------------------------------------|---------------|----------------|--------------|-----------------|
| Beta blockers                      | 31,563 (25.2) | 676 (16.3)***  | 3,082 (20.8) | 32 (9.2)***     |
| ACE inhibitors                     | 25,812 (20.6) | 613 (14.8)***  | 2,871 (19.4) | 42 (12.0)***    |
| Angiotensin II receptor blockers   | 27,153 (21.6) | 552 (13.3)***  | 2,628 (17.7) | 28 (8.0)***     |
| Diuretics                          | 35,796 (28.5) | 771 (18.6)***  | 3,775 (25.5) | 45 (12.9)***    |
| Calcium channel blockers           | 24,569 (19.6) | 528 (12.8)***  | 2,298 (15.5) | 26 (7.4)***     |
| <b>Laboratory tests, mean (SD)</b> |               |                |              |                 |
| Hemoglobin A1c, %                  | 8.01 (1.95)   | 8.39 (2.18)*** | 7.66 (1.82)  | 8.26 (2.26)***  |
| Hemoglobin, mg/dL                  | 13.4 (1.9)    | 13.3 (2.1)     | 13.7 (1.8)   | 14.1 (1.6)*     |
| eGFR, mL/min/1.73m <sup>2</sup>    | 80.3 (27.7)   | 83.1 (30.3)*** | 81.4 (24.9)  | 87.8 (25.6)***  |
| SBP, mmHg                          | 131.8 (17.9)  | 132.0 (9.1)    | 131.4 (17.1) | 130.0 (14.9)    |
| LDL cholesterol, mg/dL             | 92.3 (38.6)   | 98.4 (38.9)*** | 92.9 (37.3)  | 103.1 (38.4)*** |
| Total cholesterol, mg/dL           | 169.3 (49.2)  | 172.0 (50.3)   | 169.0 (50.8) | 173.2 (48.4)    |
| BMI, kg/m <sup>2</sup>             | 34.8 (6.7)    | 35.0 (6.8)     | 36.7 (6.2)   | 36.7 (6.3)      |

\*: p <0.05, \*\*: p <0.01, \*\*\*: p <0.001 compared with the included group.

† Patient counts for rare circumstances or diseases are obfuscated up to 10 by the database platform to safeguard protected health information that could lead to identification of certain individuals.

Abbreviations: ACE, angiotensin converting enzyme; BMI, body mass index; DPP-4, dipeptidyl peptidase-4; eGFR, estimated glomerular filtration rate; HIV, human immunodeficiency virus; HMG CoA, hydroxymethylglutaryl-CoA; LDL, low-density lipoprotein; SD, standard deviation; SES, socioeconomic status; SGLT2, sodium-glucose cotransporter 2.

**eTable 5.** Adjusted Hazard Ratios for the Components of Major Adverse Cardiovascular and Kidney Events

| Outcomes                                   | No. of patients with outcome |                     | Adjusted hazard ratio (95% CI) | <i>p</i> -value |
|--------------------------------------------|------------------------------|---------------------|--------------------------------|-----------------|
|                                            | Tirzepatide (n=14,832)       | GLP-1 RA (n=14,832) |                                |                 |
| <b>Major adverse cardiovascular events</b> |                              |                     |                                |                 |
| Myocardial infarction                      | 230                          | 286                 | 0.81 (0.68–0.97)               | 0.02            |
| Ischemic/hemorrhagic stroke                | 284                          | 363                 | 0.78 (0.67–0.91)               | 0.002           |
| Cardiac death                              | 33                           | 36                  | 0.91 (0.56–1.45)               | 0.68            |
| <b>Major adverse kidney events</b>         |                              |                     |                                |                 |
| Stage 5 chronic kidney disease             | 16                           | 35                  | 0.45 (0.25–0.82)               | 0.01            |
| End-stage renal disease                    | 55                           | 111                 | 0.49 (0.35–0.67)               | <0.001          |

Abbreviations: CI, confidence interval; GLP-1 RAs, Glucagon-like peptide-1 receptor agonists.

**eTable 6.** Sensitivity Analysis Incorporating Individuals Without Follow-Up Into Propensity Score Matching and Survival Analysis of Primary and Secondary Outcomes

| Outcomes                                | Main analysis    |                 | Sensitivity analysis |                 |
|-----------------------------------------|------------------|-----------------|----------------------|-----------------|
|                                         | aHR (95%CI)      | <i>p</i> -value | aHR (95%CI)          | <i>p</i> -value |
| No. of patients in each group, post-PSM | 14,832           |                 | 15,181               |                 |
| <b>Primary outcome</b>                  |                  |                 |                      |                 |
| All-cause mortality                     | 0.58 (0.45–0.75) | <0.001          | 0.52 (0.40–0.67)     | <0.001          |
| <b>Secondary outcomes</b>               |                  |                 |                      |                 |
| MACE                                    | 0.80 (0.71–0.91) | <0.001          | 0.83 (0.73–0.93)     | <0.001          |
| MACE and all-cause mortality            | 0.76 (0.68–0.84) | <0.001          | 0.75 (0.67–0.84)     | <0.001          |
| Kidney events                           | 0.52 (0.37–0.73) | <0.001          | 0.53 (0.38–0.74)     | <0.001          |
| AKI                                     | 0.78 (0.70–0.88) | <0.001          | 0.82 (0.73–0.92)     | <0.001          |
| MAKE                                    | 0.54 (0.44–0.67) | <0.001          | 0.51 (0.41–0.64)     | <0.001          |

Abbreviations: aHR, adjusted hazard ratio; CI, confidence interval; GLP-1 RAs, Glucagon-like peptide-1 receptor agonists; MACE, major adverse cardiovascular events; MAKE, major adverse kidney events; PSM, propensity score matching.

**eTable 7.** Changes in Mean Glycated Hemoglobin Level and Body Weight (95% CI)

| Times points | Glycated hemoglobin level, %            |                        | Body weight, kg                      |                     |
|--------------|-----------------------------------------|------------------------|--------------------------------------|---------------------|
|              | Tirzepatide                             | GLP-1 RA               | Tirzepatide                          | GLP-1 RA            |
| 4 months     | −0.87 (−0.90 to −0.84)                  | −0.66 (−0.69 to −0.63) | −2.8 (−3.1 to −2.5)                  | −1.5 (−1.8 to −1.2) |
| 8 months     | −1.10 (−1.13 to −1.08)                  | −0.78 (−0.81 to −0.76) | −5.6 (−6.0 to −5.3)                  | −3.2 (−3.5 to −2.8) |
| 12 months    | −1.11 (−1.14 to −1.08)                  | −0.74 (−0.77 to −0.71) | −7.3 (−7.9 to −6.8)                  | −4.5 (−5.0 to −4.0) |
| 16 months    | −1.15 (−1.20 to −1.11)                  | −0.74 (−0.78 to −0.70) | −9.1 (−10.0 to −8.2)                 | −6.5 (−7.4 to −5.7) |
| 20 months    | −1.06 (−1.14 to −0.98)                  | −0.72 (−0.78 to −0.65) | −9.8 (−11.1 to −8.4)                 | −6.8 (−8.1 to −5.5) |
| TD*          | −0.34 (−0.44 to −0.24), <i>p</i> <0.001 |                        | −2.9 (−4.8 to −1.1), <i>p</i> =0.002 |                     |

\* Mean treatment difference at 20 months (95% CI).

Abbreviations: CI, confidence interval; GLP-1 RAs, Glucagon-like peptide-1 receptor agonists.



**eFigure 1.** Changes in Glycated Hemoglobin Level and Body Weight From Baseline

**1A.** Changes in glycated hemoglobin level

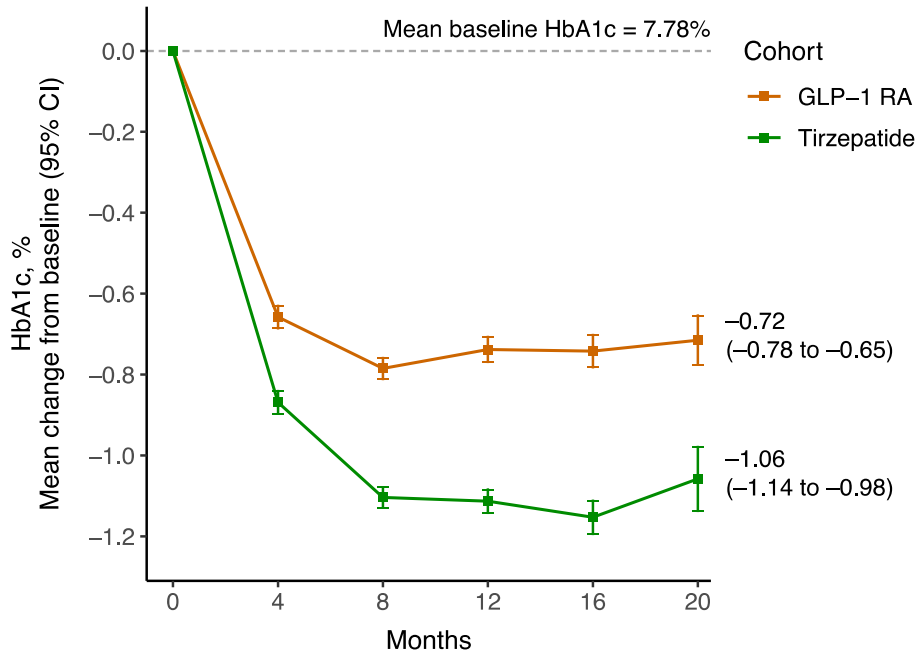

**1B.** Changes in body weight

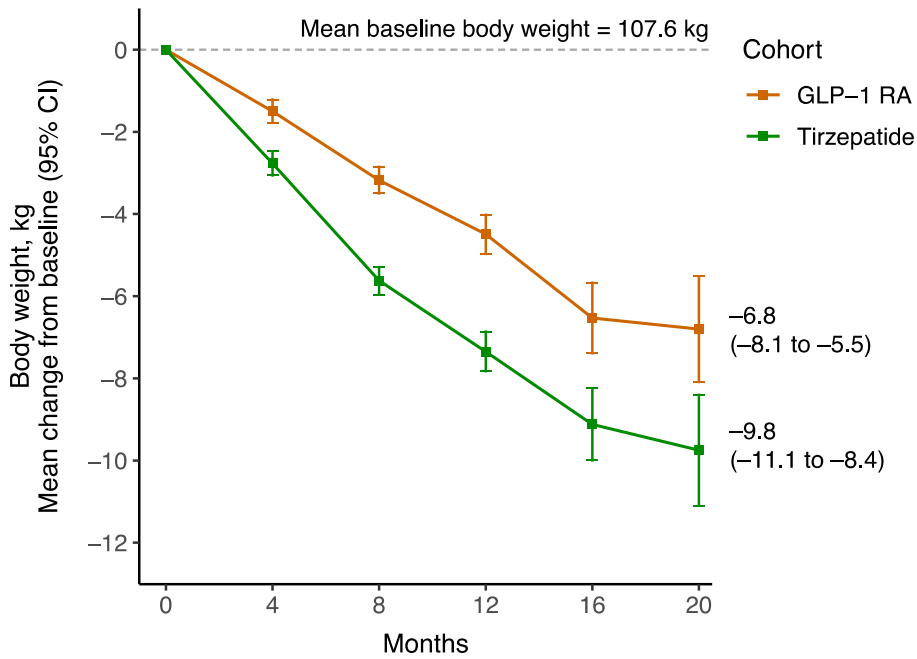

Abbreviations: CI, confidence interval; GLP-1 RA, glucagon-like peptide-1 receptor agonist.

**eFigure 2.** Forest Plot of Primary and Secondary Outcomes Compared Between Different Doses of Tirzepatide and GLP-1 RA

**2A.** Tirzepatide compared to all GLP-1 RA or only those who received the maximal doses of GLP-1 RA

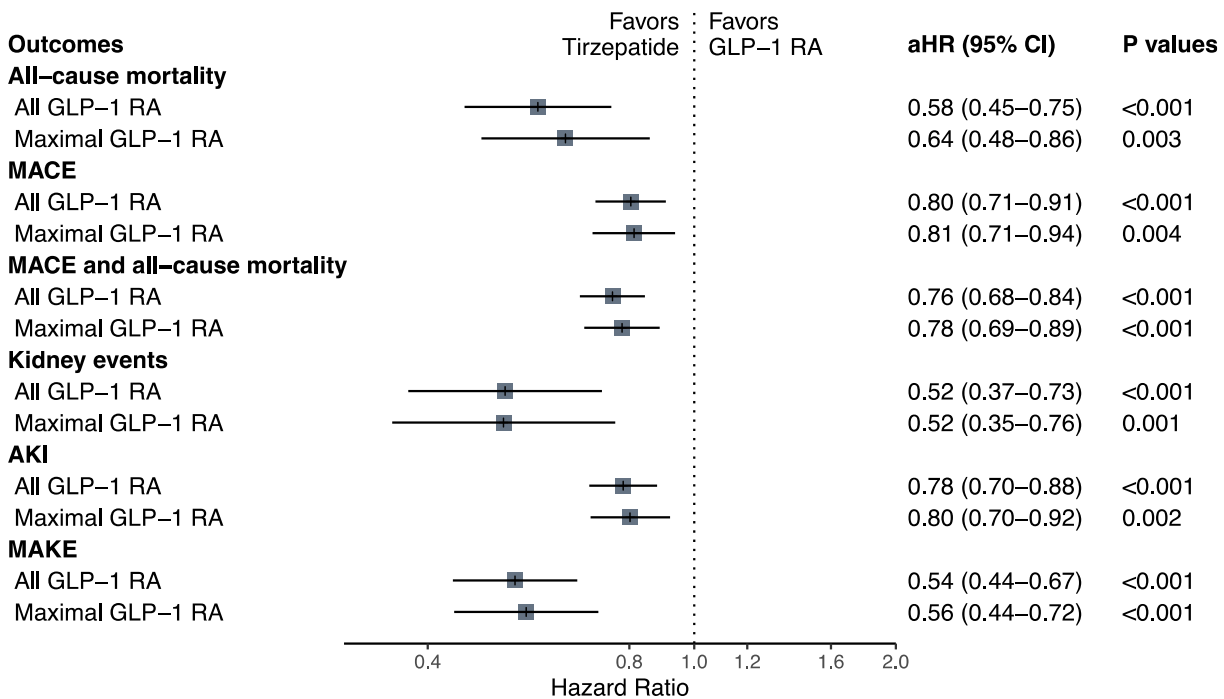

Abbreviations: aHR, adjusted hazard ratio; AKI, acute kidney injury; 95% CI, 95% confidence interval; GLP-1 RA, glucagon-like peptide-1 receptor agonist; MACE, major adverse cardiovascular events; MAKE, major adverse kidney events.

**2B.** Low-dose (maximum  $\leq 7.5$  mg) or high-dose (maximum  $\geq 10$  mg) tirzepatide compared to all GLP-RA

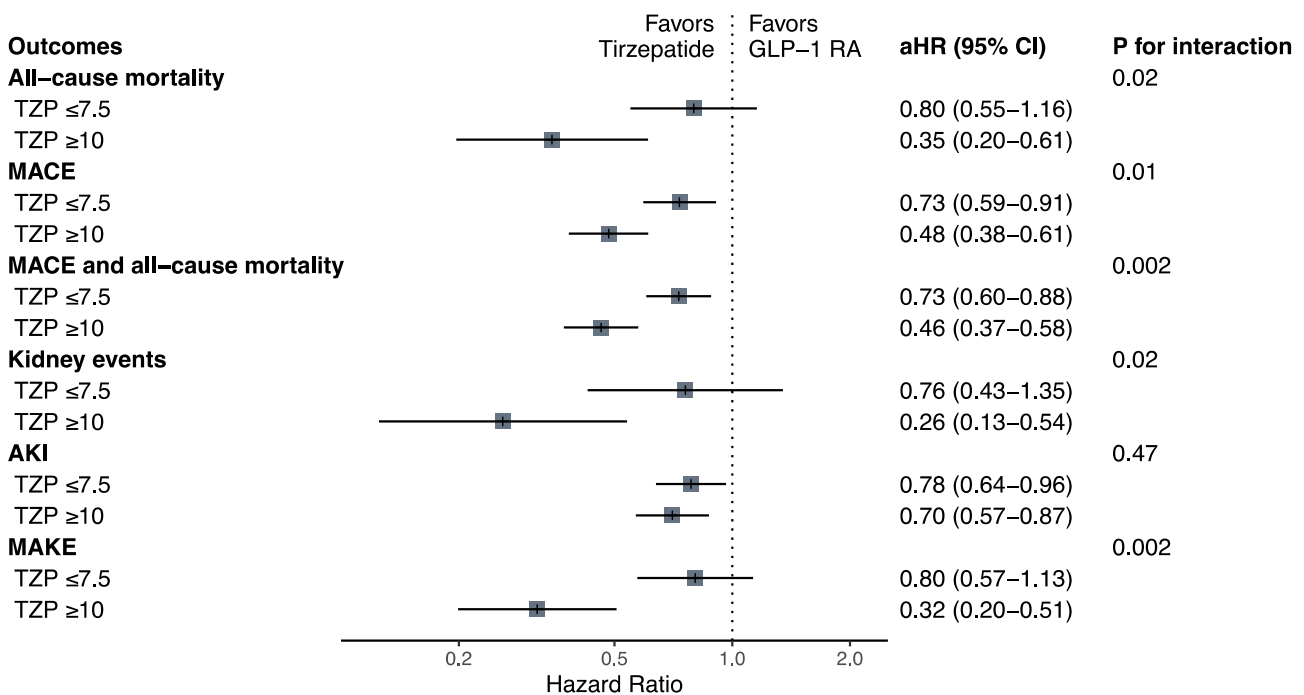

Abbreviations: aHR, adjusted hazard ratio; AKI, acute kidney injury; 95% CI, 95% confidence interval; GLP-1 RA, glucagon-like peptide-1 receptor agonist; MACE, major adverse cardiovascular events; MAKE, major adverse kidney events; TZP, tirzepatide.

**2C.** Low-dose (maximum  $\leq 7.5$  mg) or high-dose (maximum  $\geq 10$  mg) tirzepatide compared to those who received the maximal doses of GLP1-RA

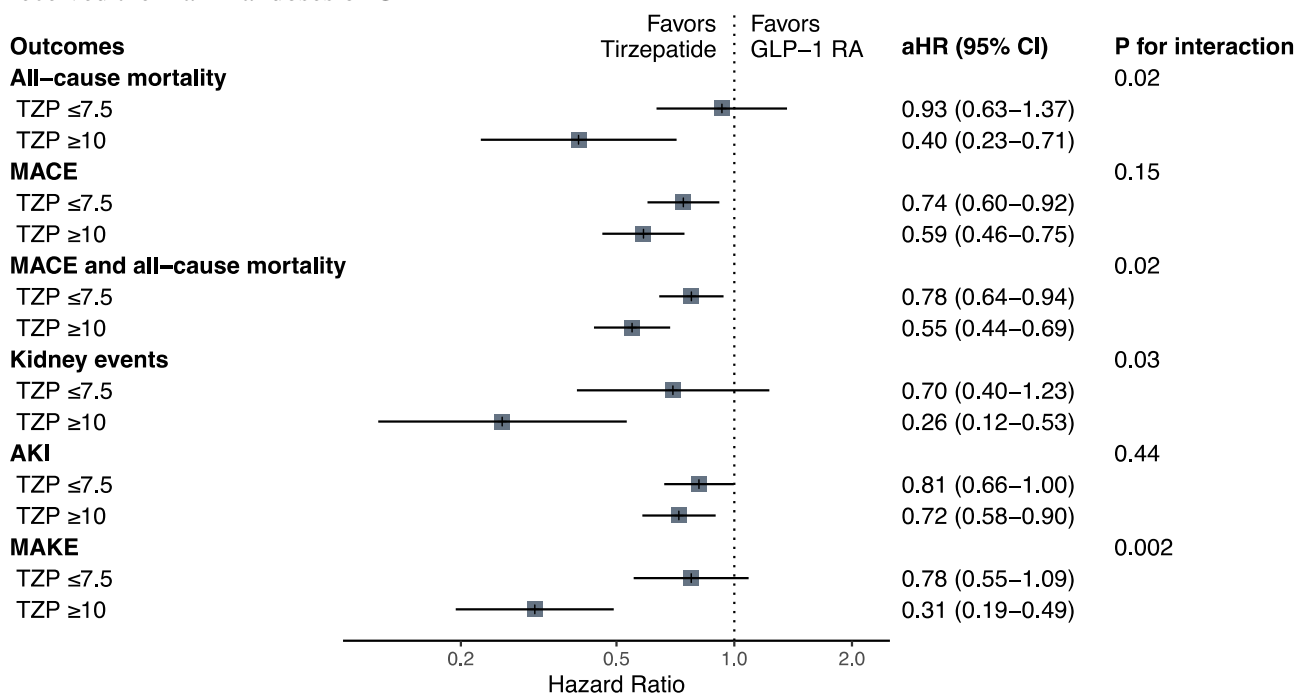

Abbreviations: aHR, adjusted hazard ratio; AKI, acute kidney injury; 95% CI, 95% confidence interval; GLP-1 RA, glucagon-like peptide-1 receptor agonist; MACE, major adverse cardiovascular events; MAKE, major adverse kidney events; TZP, tirzepatide.

**eFigure 3.** Results for Negative Control Outcomes and Analysis With Negative Control Exposure

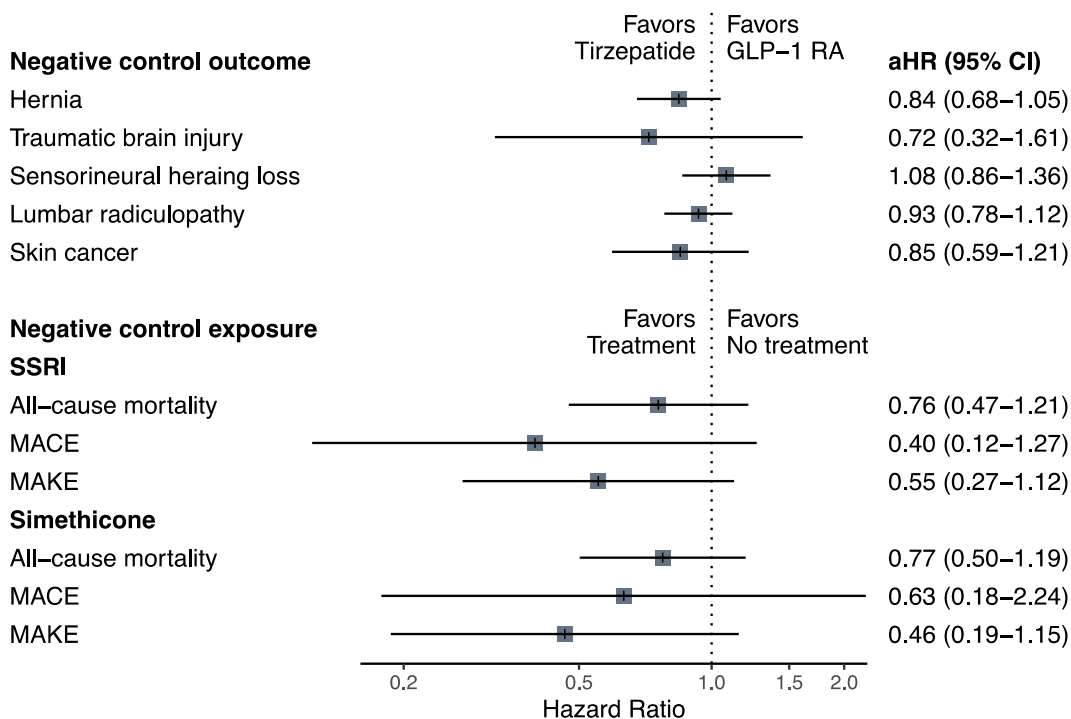

Abbreviations: aHR, adjusted hazard ratio; 95% CI, 95% confidence interval; GLP-1 RA, glucagon-like peptide-1 receptor agonist; MACE, major adverse cardiovascular events; MAKE, major adverse kidney events; SSRI, selective serotonin reuptake inhibitors.

**eFigure 4.** Subgroup Analysis of All-Cause Mortality Between Tirzepatide and GLP-1 RA Groups

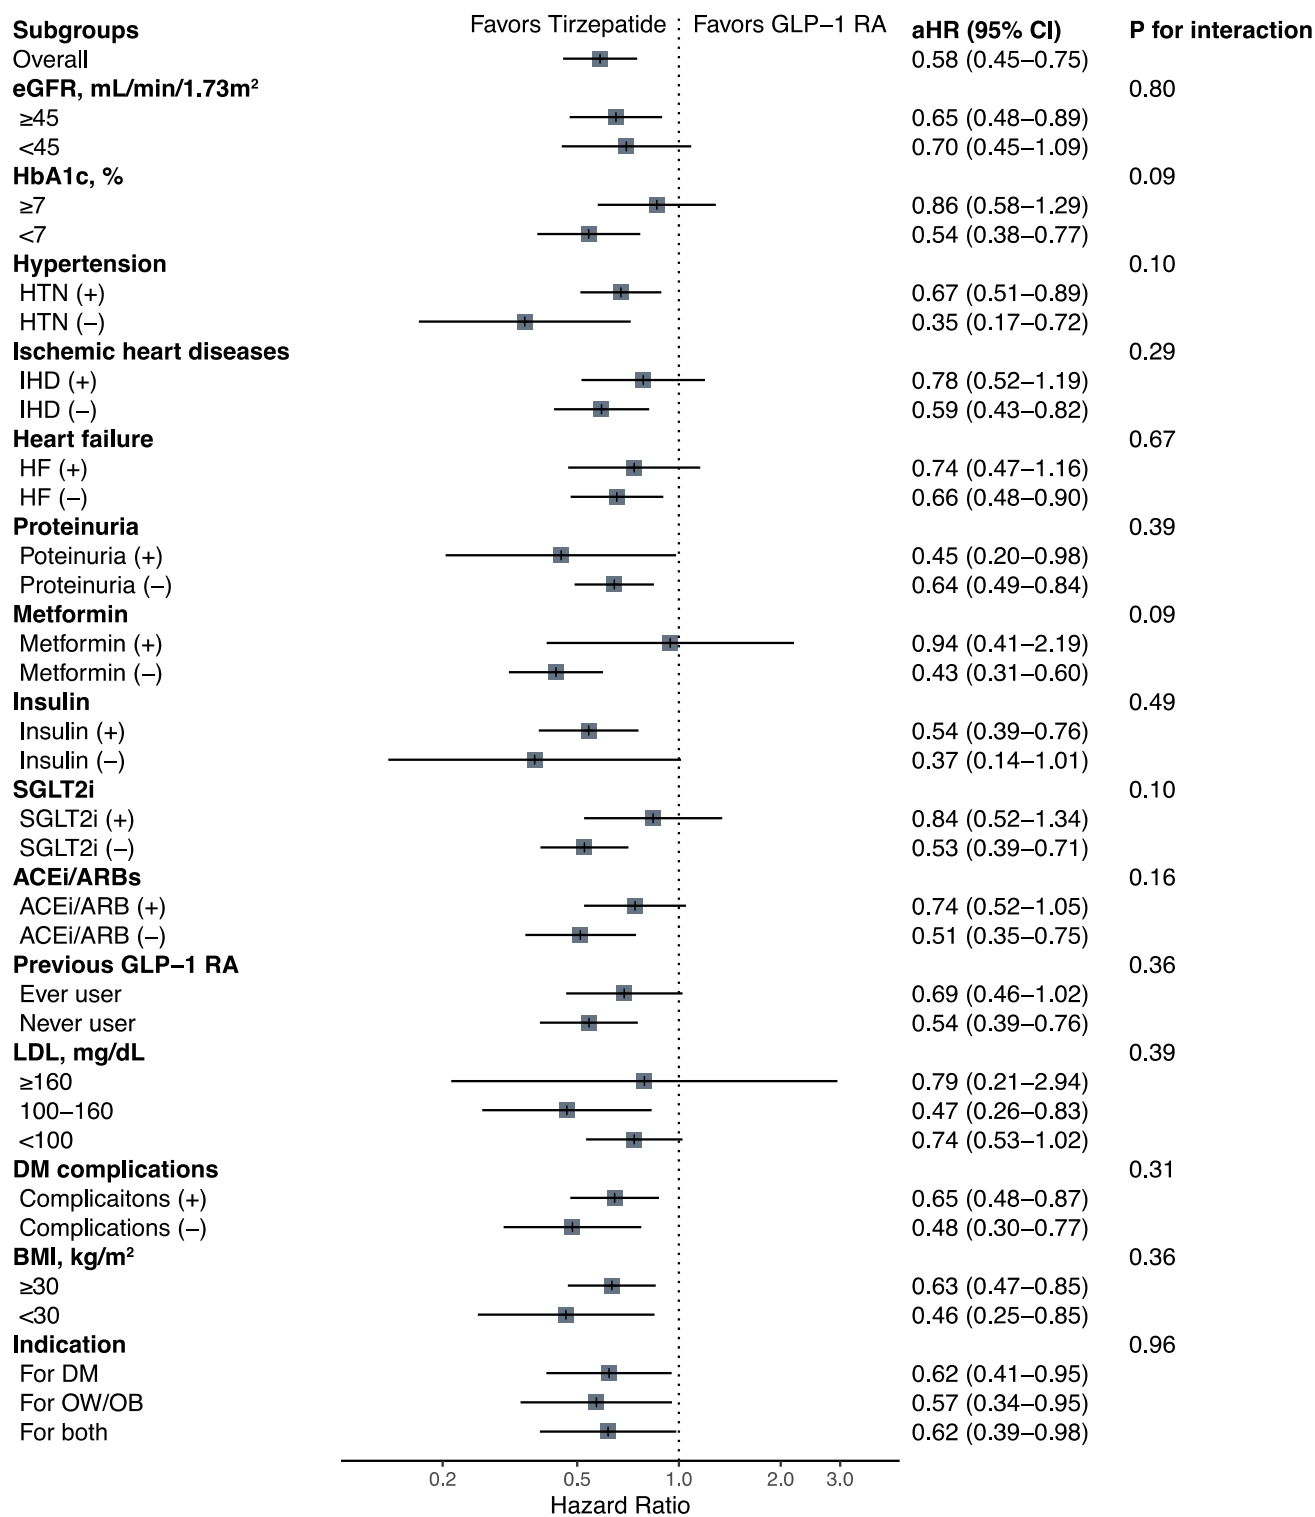

Abbreviations: ACEi, angiotensin converting enzyme inhibitor; ARB, angiotensin II receptor blocker; aHR, adjusted hazard ratio; BMI, body mass index; 95% CI, 95% confidence interval; DM, diabetes mellitus; eGFR, estimated glomerular filtration rate; GLP-1 RA, glucagon-like peptide-1 receptor agonist; LDL, low-density lipoprotein cholesterol; MACE, major adverse cardiovascular events; MAKE, major adverse kidney events; OB, obesity; OW, overweight; SGLT2i, sodium-glucose cotransporter 2 inhibitors.

**eFigure 5.** Subgroup Analysis of Major Adverse Cardiovascular Events Between Tirzepatide and GLP-1 RA Groups

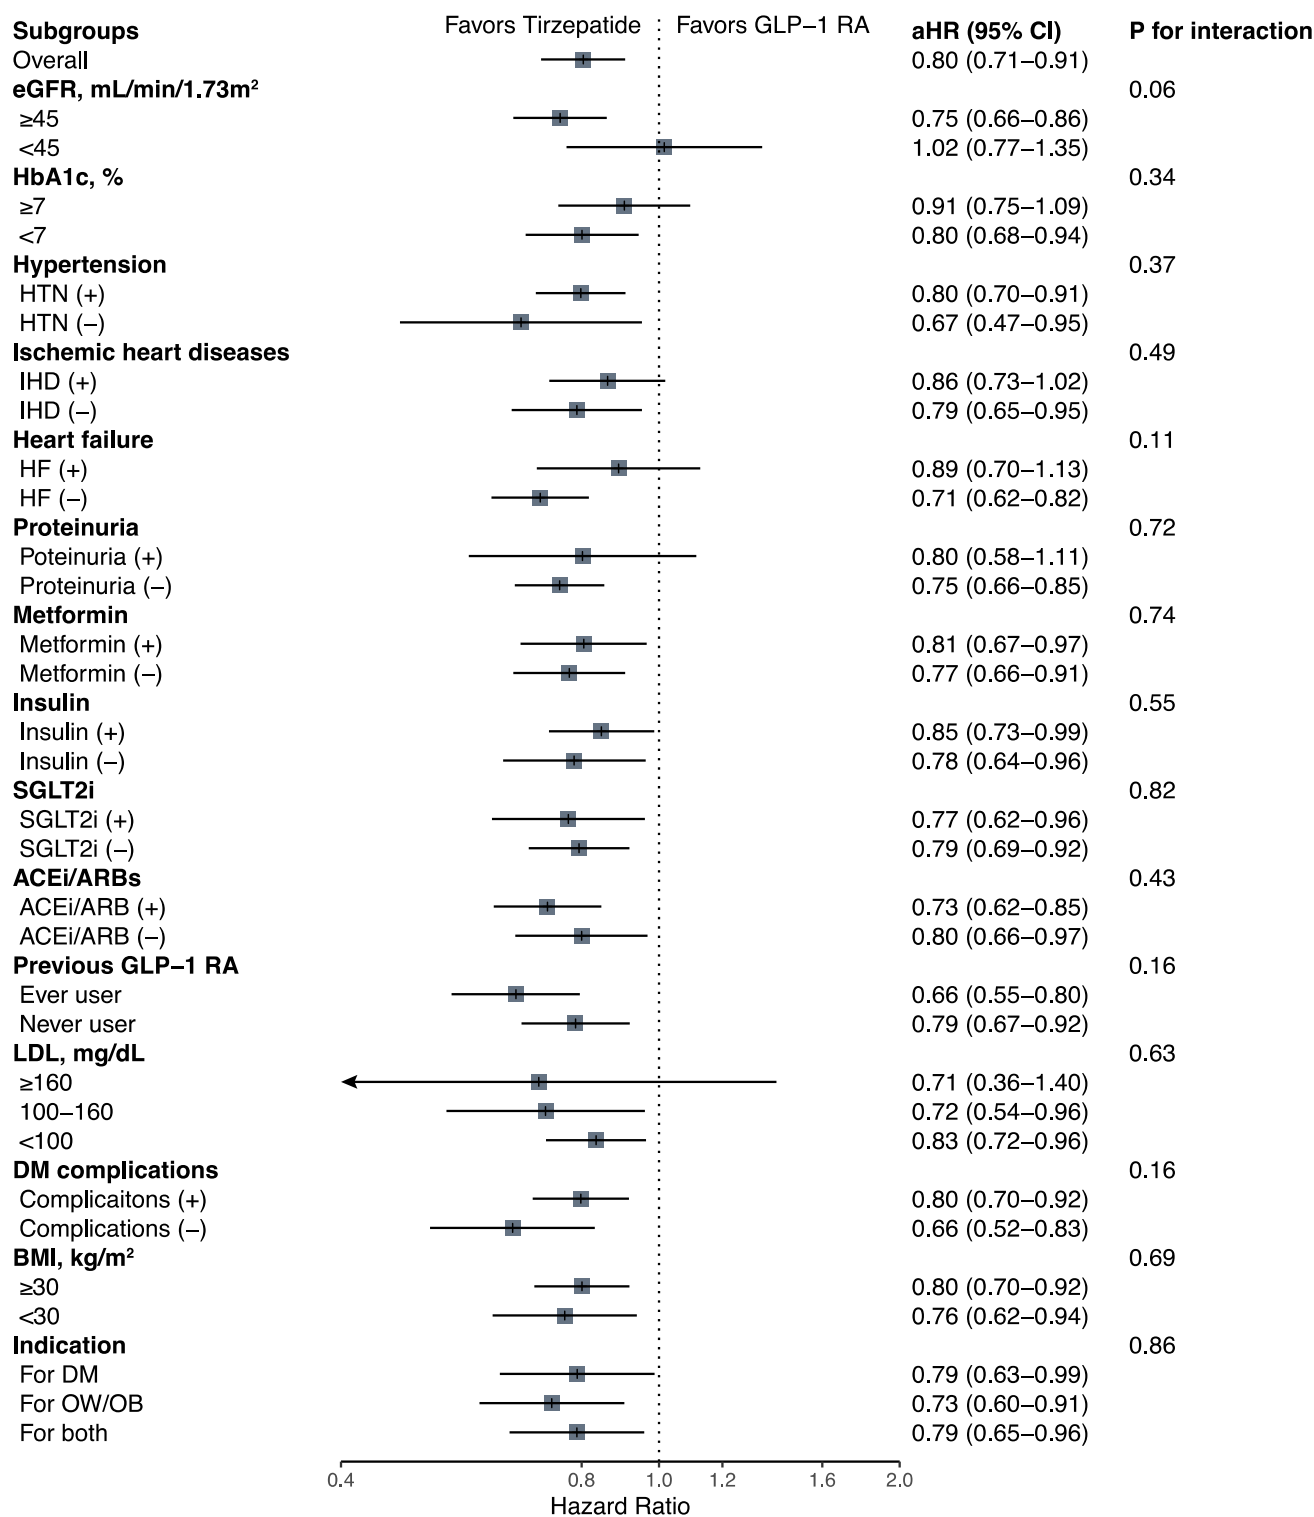

Abbreviations: ACEi, angiotensin converting enzyme inhibitor; ARB, angiotensin II receptor blocker; aHR, adjusted hazard ratio; BMI, body mass index; 95% CI, 95% confidence interval; DM, diabetes mellitus; eGFR, estimated glomerular filtration rate; GLP-1 RA, glucagon-like peptide-1 receptor agonist; LDL, low-density lipoprotein cholesterol; MACE, major adverse cardiovascular events; MAKE, major adverse kidney events; OB, obesity; OW, overweight; SGLT2i, sodium-glucose cotransporter 2 inhibitors.

**eFigure 6.** Subgroup Analysis of the Composite of Major Adverse Cardiovascular Events and All-Cause Mortality Between Tirzepatide and GLP-1 RA Groups

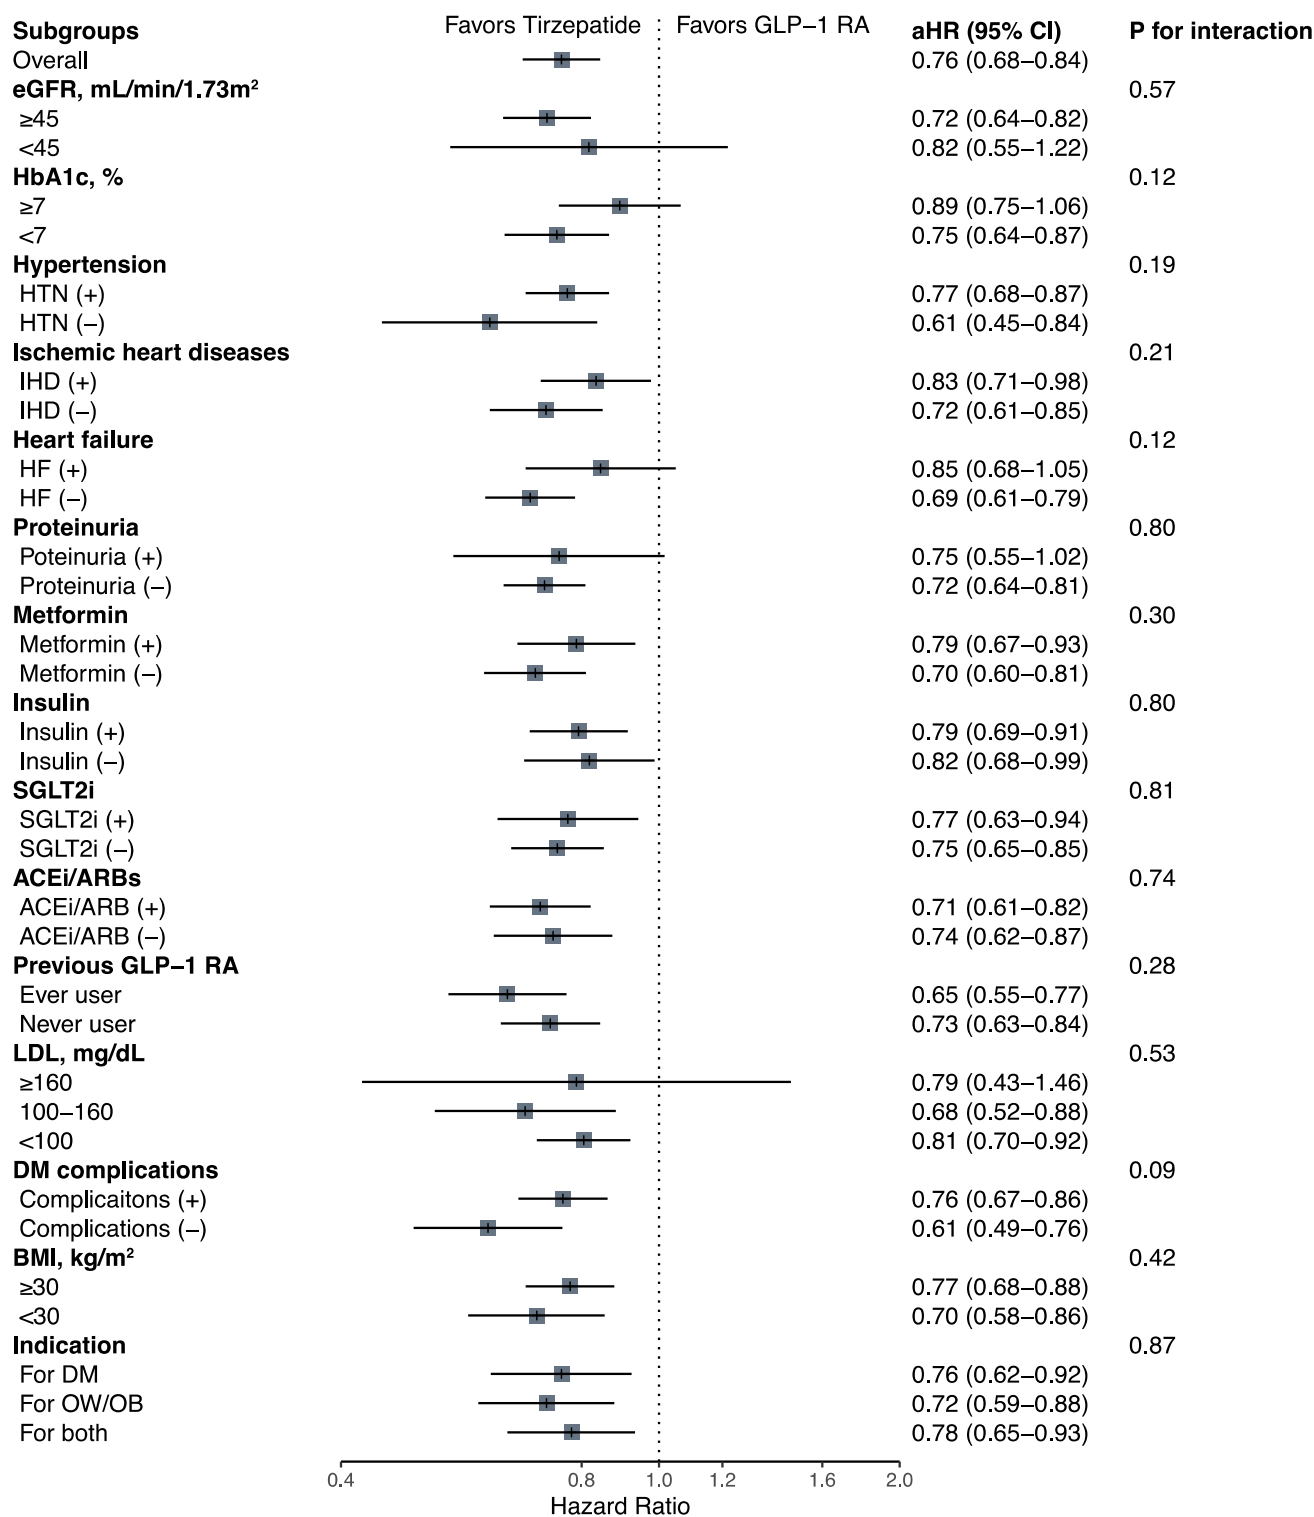

Abbreviations: ACEi, angiotensin converting enzyme inhibitor; ARB, angiotensin II receptor blocker; aHR, adjusted hazard ratio; BMI, body mass index; 95% CI, 95% confidence interval; DM, diabetes mellitus; eGFR, estimated glomerular filtration rate; GLP-1 RA, glucagon-like peptide-1 receptor agonist; LDL, low-density lipoprotein cholesterol; MACE, major adverse cardiovascular events; MAKE, major adverse kidney events; OB, obesity; OW, overweight; SGLT2i, sodium-glucose cotransporter 2 inhibitors.

**eFigure 7.** Subgroup Analysis of Kidney Events Between Tirzepatide and GLP-1 RA Groups

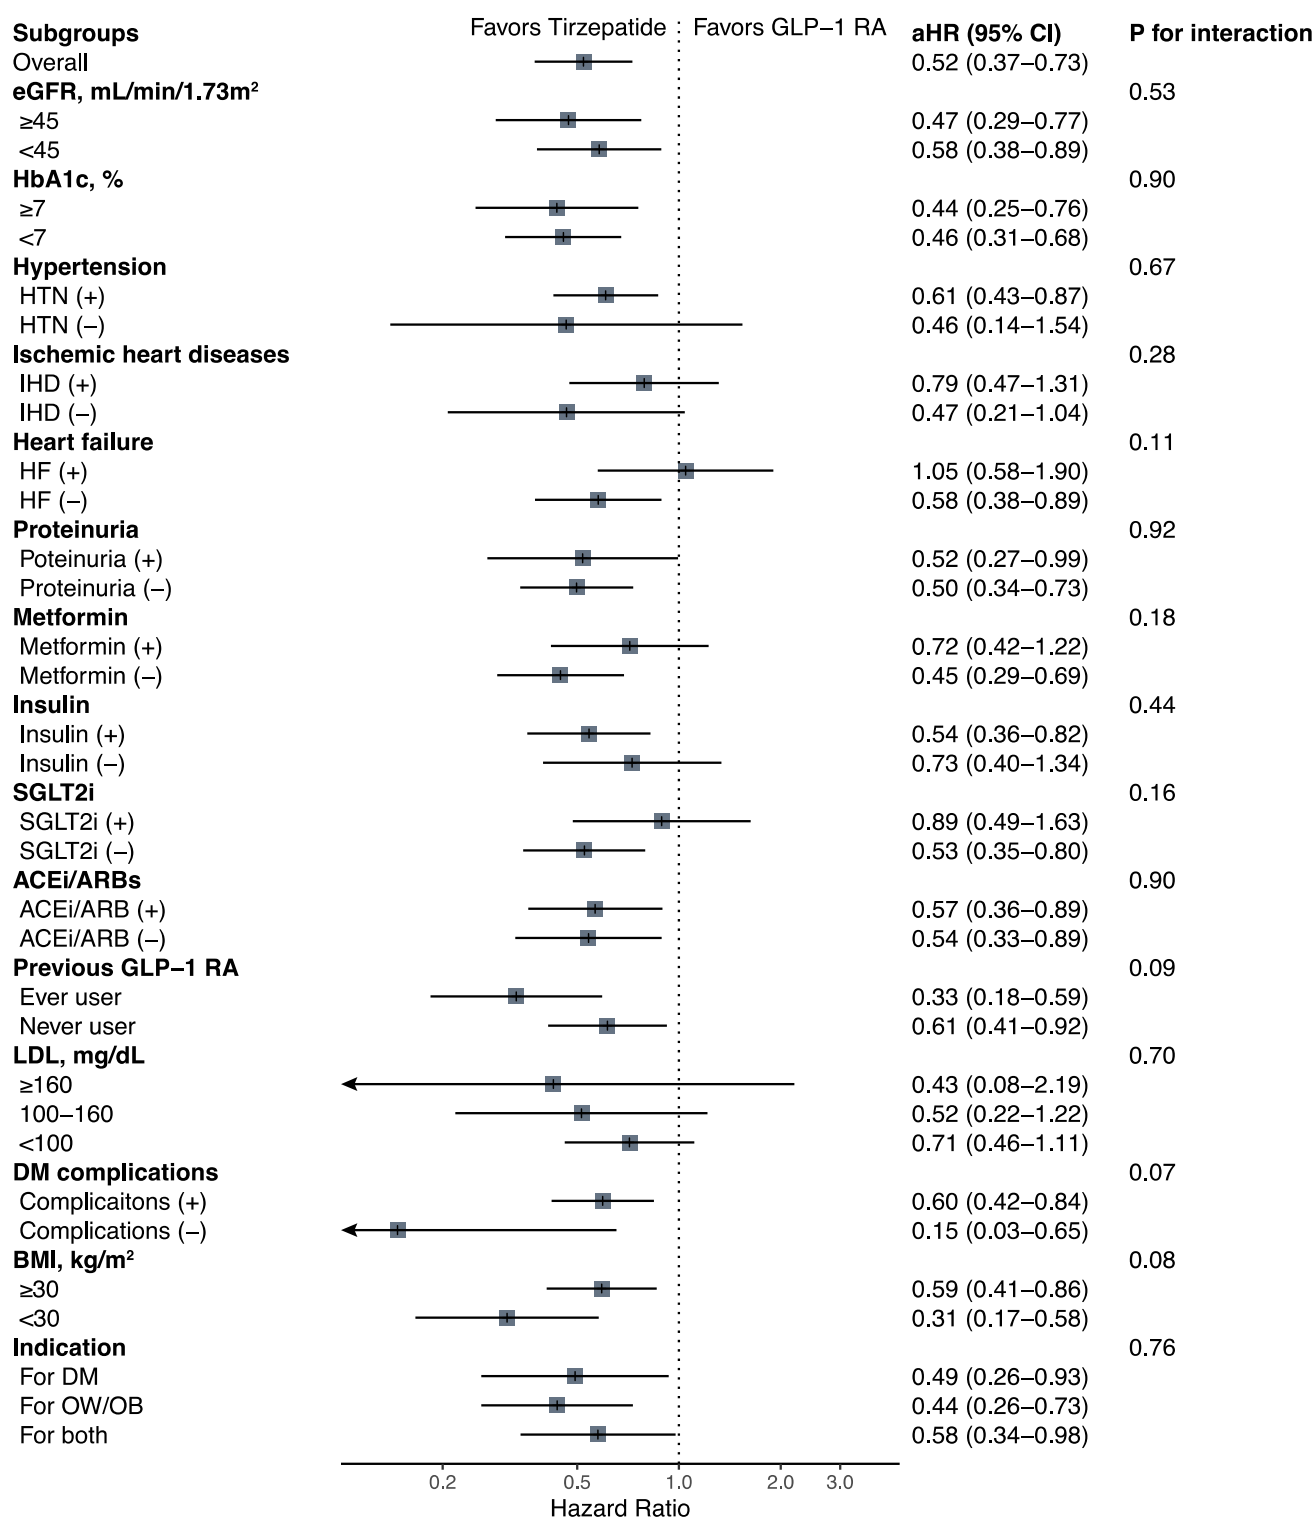

Abbreviations: ACEi, angiotensin converting enzyme inhibitor; ARB, angiotensin II receptor blocker; aHR, adjusted hazard ratio; BMI, body mass index; 95% CI, 95% confidence interval; DM, diabetes mellitus; eGFR, estimated glomerular filtration rate; GLP-1 RA, glucagon-like peptide-1 receptor agonist; LDL, low-density lipoprotein cholesterol; MACE, major adverse cardiovascular events; MAKE, major adverse kidney events; OB, obesity; OW, overweight; SGLT2i, sodium-glucose cotransporter 2 inhibitors.

**eFigure 8.** Subgroup Analysis of Acute Kidney Injury Between Tirzepatide and GLP-1 RA Groups

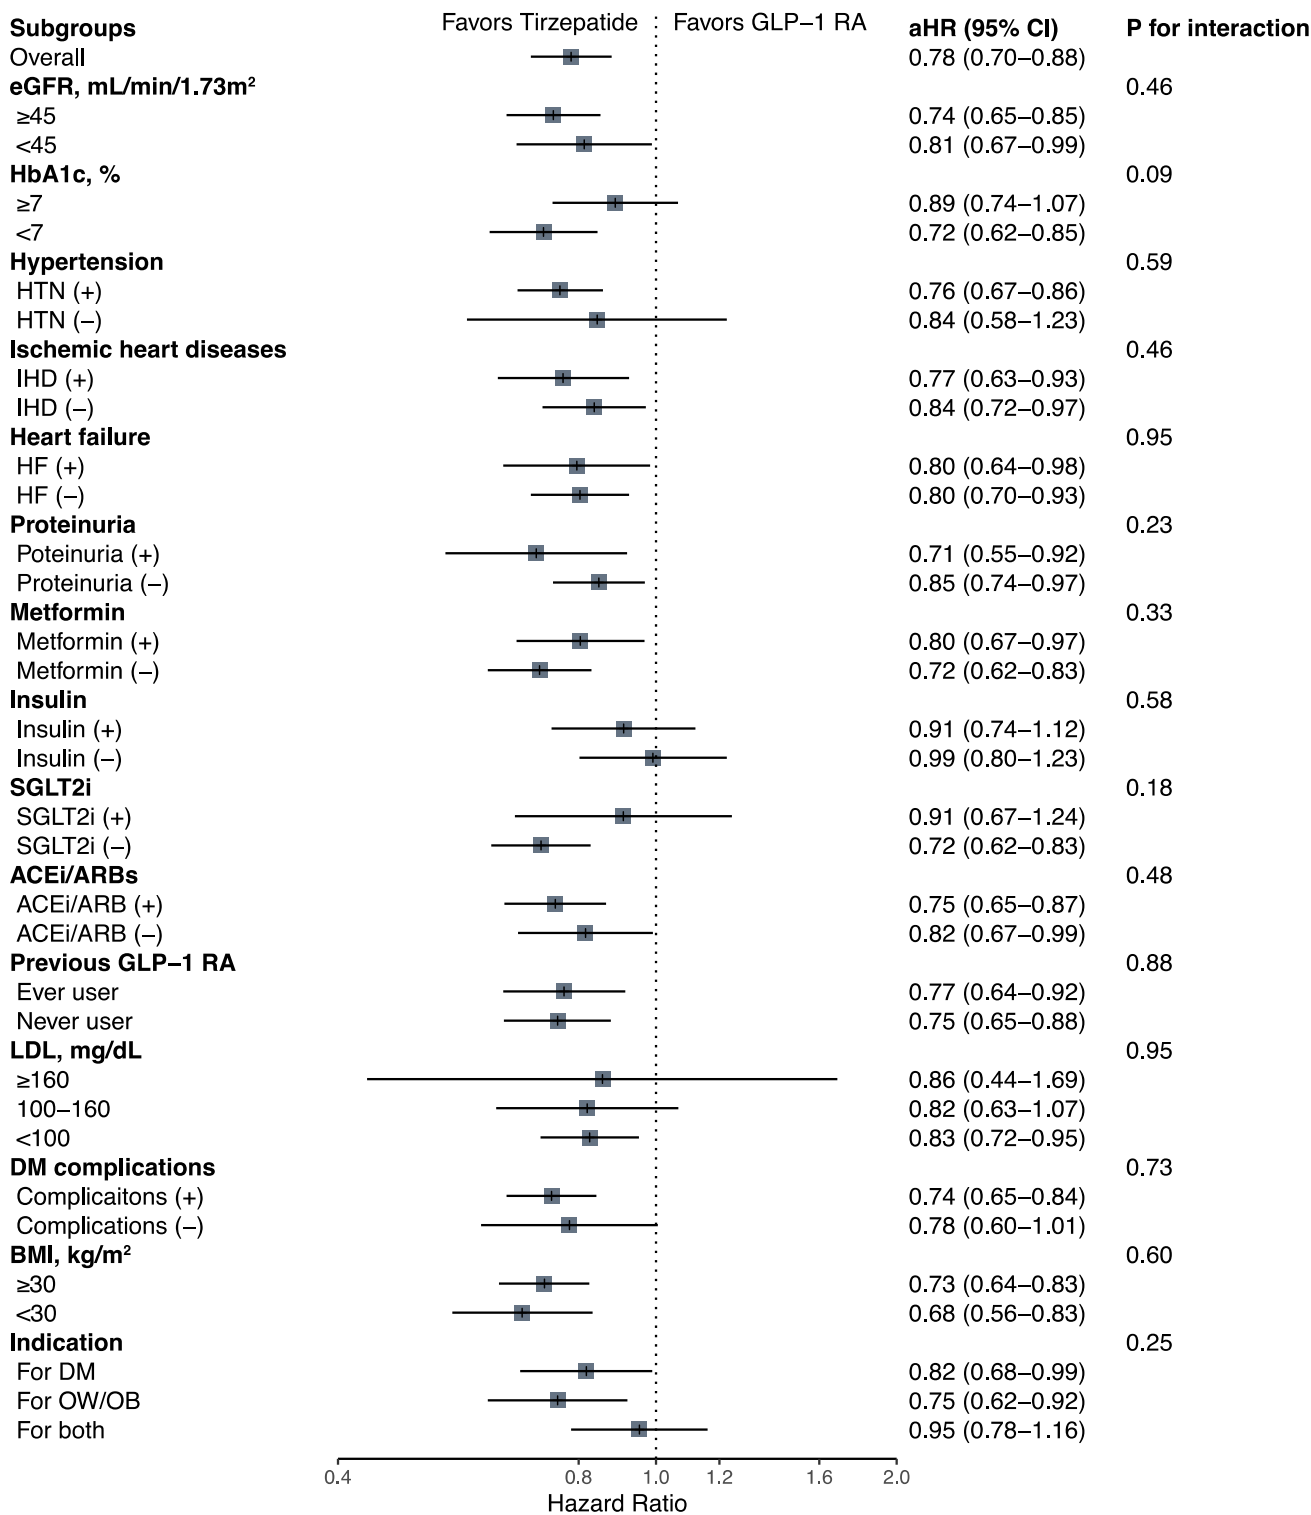

Abbreviations: ACEi, angiotensin converting enzyme inhibitor; ARB, angiotensin II receptor blocker; aHR, adjusted hazard ratio; BMI, body mass index; 95% CI, 95% confidence interval; DM, diabetes mellitus; eGFR, estimated glomerular filtration rate; GLP-1 RA, glucagon-like peptide-1 receptor agonist; LDL, low-density lipoprotein cholesterol; MACE, major adverse cardiovascular events; MAKE, major adverse kidney events; OB, obesity; OW, overweight; SGLT2i, sodium-glucose cotransporter 2 inhibitors.



**eFigure 9.** Subgroup Analysis of Major Adverse Kidney Events Between Tirzepatide and GLP-1 RA Groups

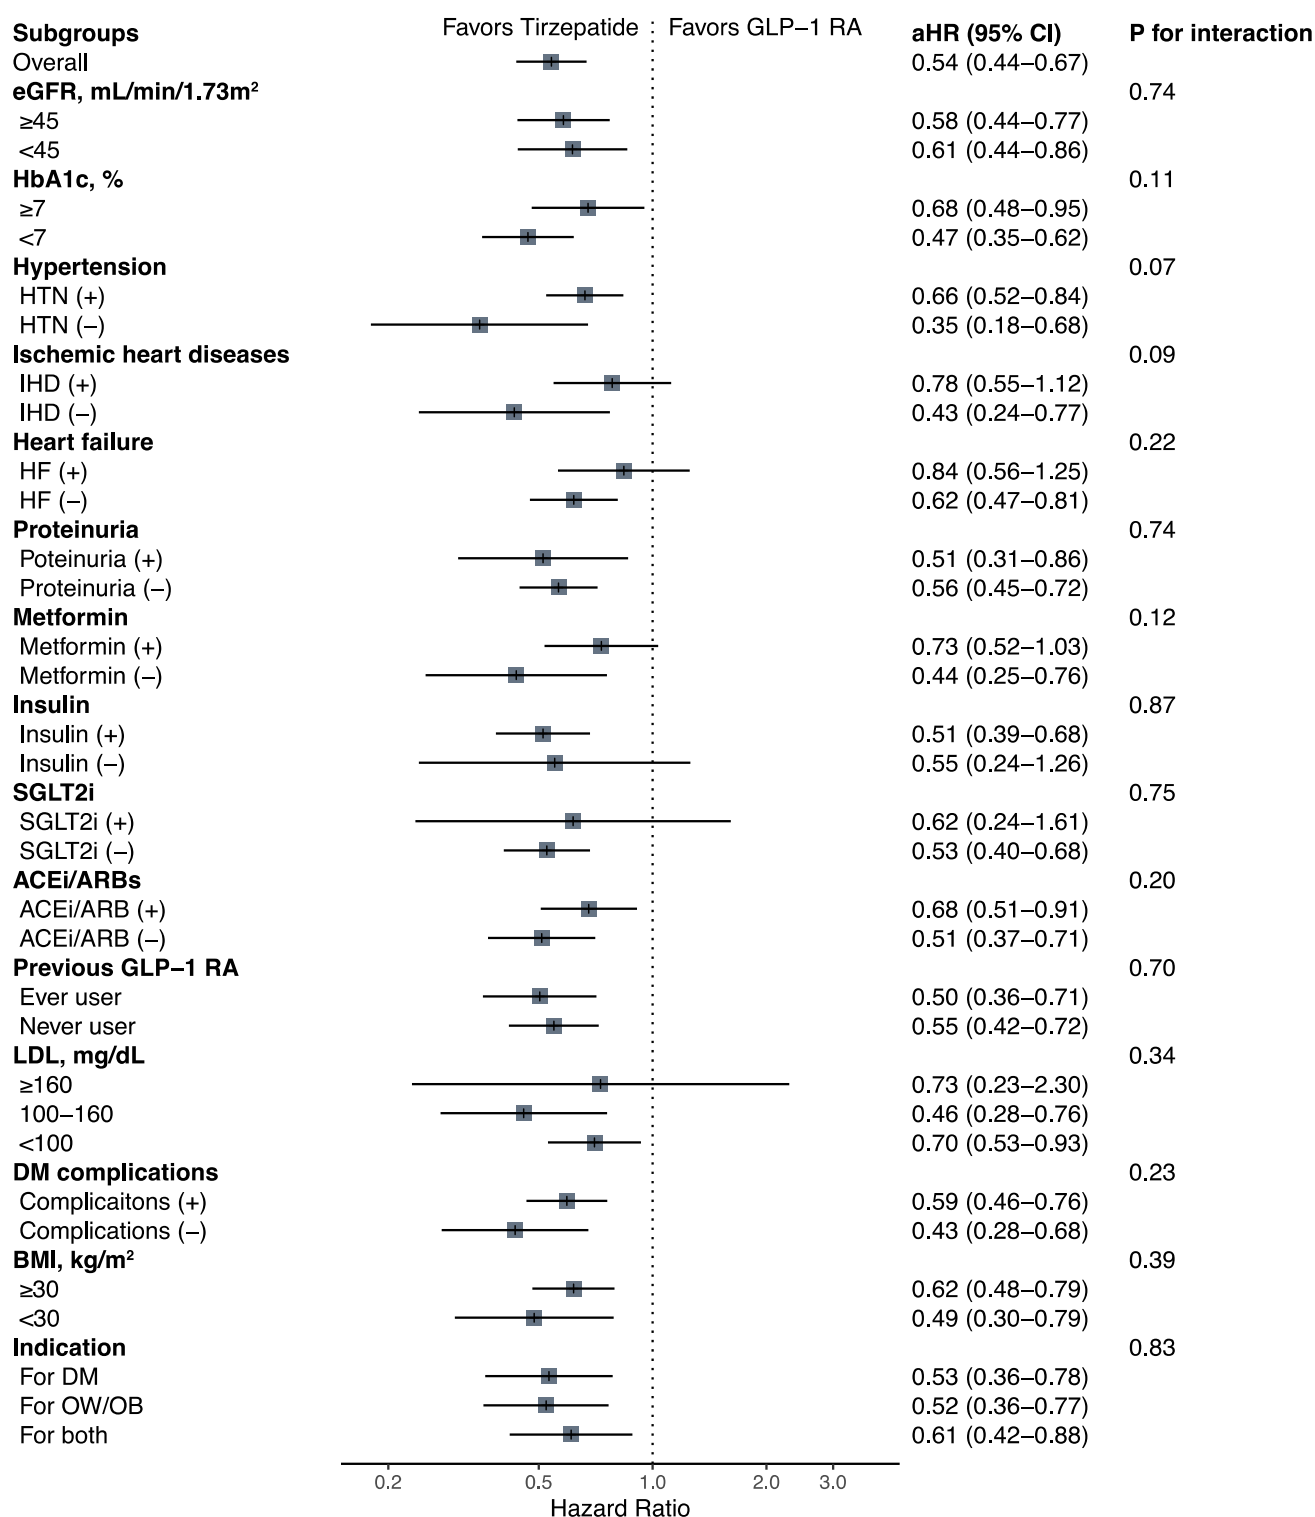

Abbreviations: ACEi, angiotensin converting enzyme inhibitor; ARB, angiotensin II receptor blocker; aHR, adjusted hazard ratio; BMI, body mass index; 95% CI, 95% confidence interval; DM, diabetes mellitus; eGFR, estimated glomerular filtration rate; GLP-1 RA, glucagon-like peptide-1 receptor agonist; LDL, low-density lipoprotein cholesterol; MACE, major adverse cardiovascular events; MAKE, major adverse kidney events; OB, obesity; OW, overweight; SGLT2i, sodium-glucose cotransporter 2 inhibitors.
