# Supplementary material for: Clinical Outcomes of Tirzepatide or GLP-1 Receptor Agonists in Individuals With Type 2 Diabetes
Source: PubMed Central journal article supplement (PMC11320168; doi:10.1001/jamanetworkopen.2024.27258), 2024-08-12
Supplement: jamanetwopen-e2427258-s002.pdf [file jamanetwopen-e2427258-s002.pdf]

## Data Sharing Statement

Chuang. Clinical Outcomes of Tirzepatide or GLP-1 Receptor Agonists in Individuals With Type 2 Diabetes. *JAMA Netw Open*. Published August 12, 2024.  
doi:10.1001/jamanetworkopen.2024.27258

### Data

**Data available:** No
